# Supplementary material
Source: PubMed Central journal article supplement (PMC3491145)

# Supplementary Figure 1

A

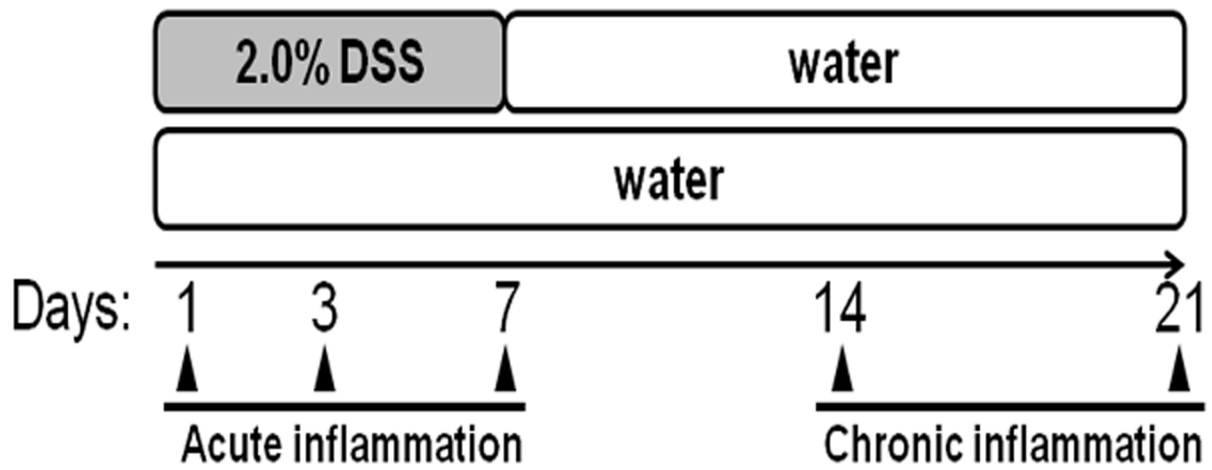

B

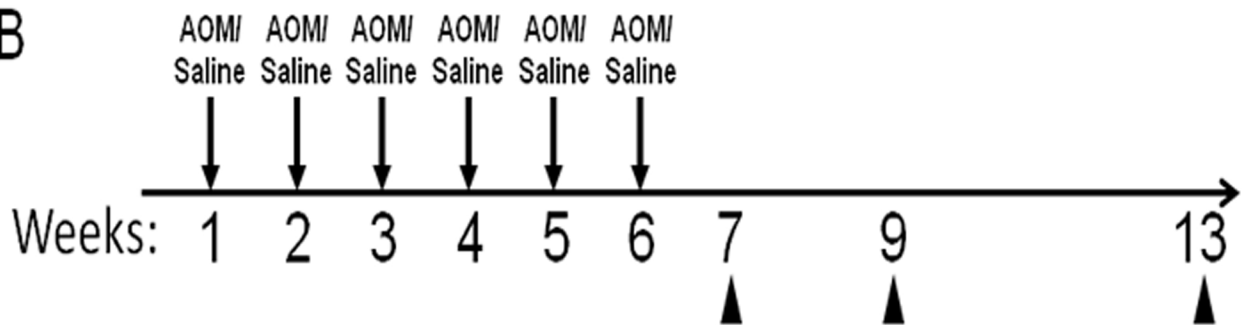

# Supplementary Figure 2

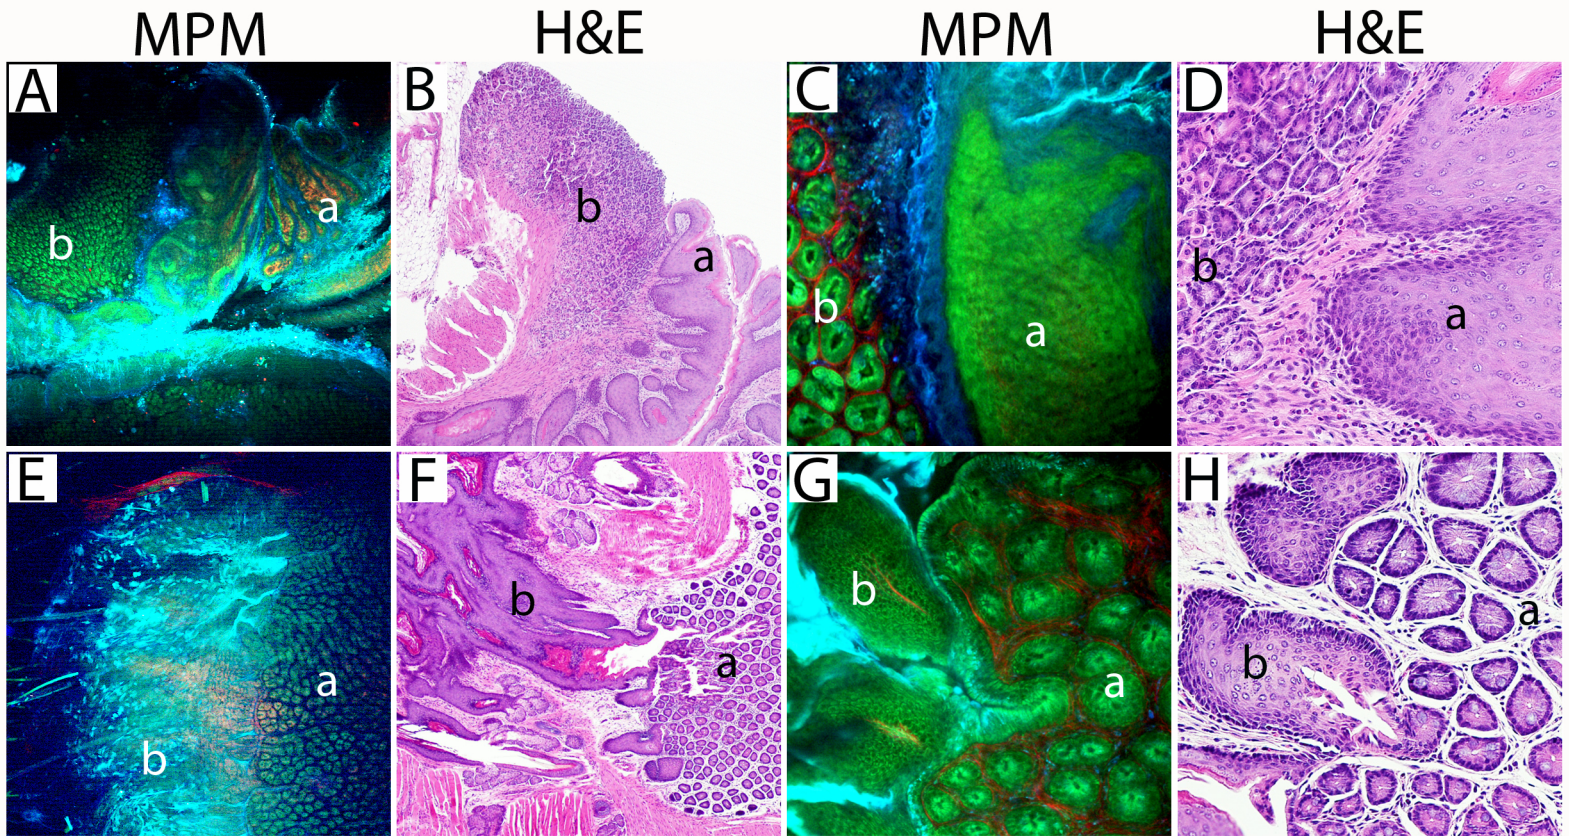

# Supplementary Figure 3

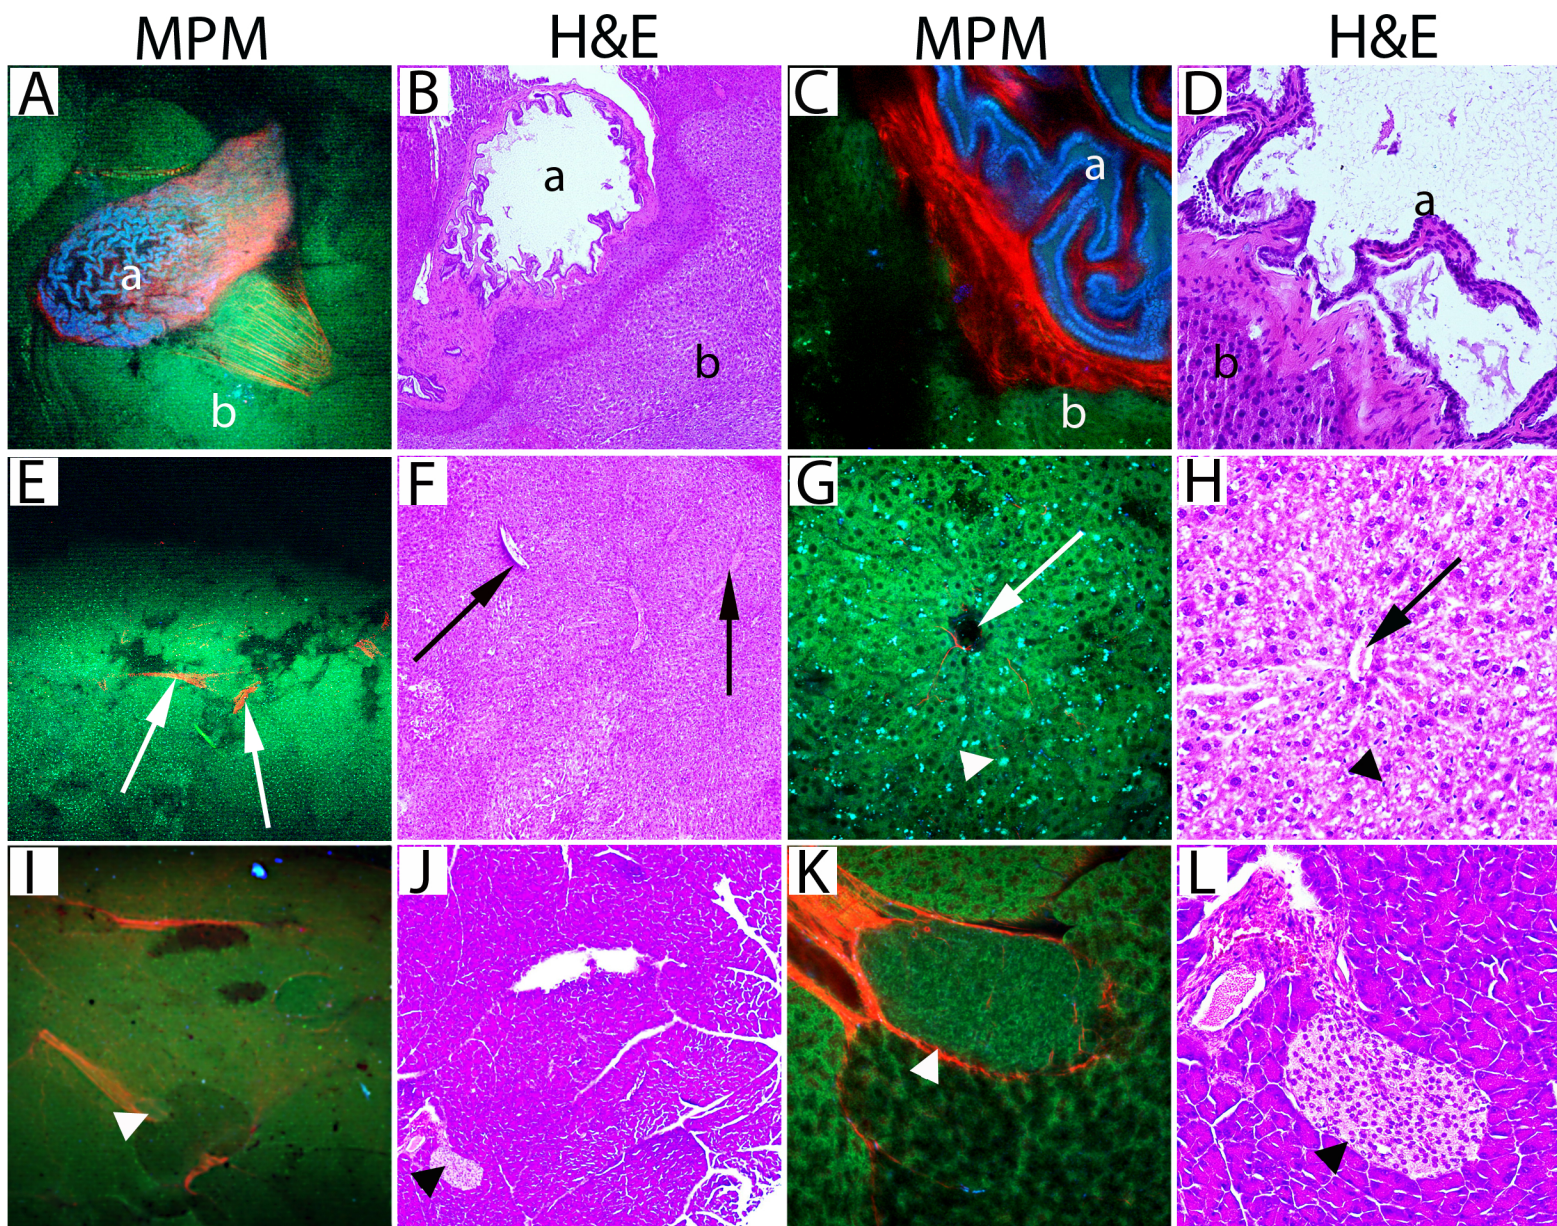

Supplement: NIHMS405068-supplement-1.pdf [file NIHMS405068-supplement-1.pdf]
